# Supplementary material for: Identification of methotrexate as a heterochromatin-promoting drug
Source: PubMed Central journal article supplement (PMC6690983; doi:10.1038/s41598-019-48137-w), 2019-08-12
Supplement: 41598_2019_48137_MOESM1_ESM.pdf [file 41598_2019_48137_MOESM1_ESM.pdf]

## Supplementary Information

### Identification of methotrexate as a heterochromatin-promoting drug

Andre C. Loyola, Lin Zhang, Robin Shang, Pranabananda Dutta, Jinghong Li, & Willis X. Li<sup>§</sup>

Department of Medicine, University of California San Diego, La Jolla, CA 92093

§ corresponding author (wxli@ucsd.edu)

Running title: Methotrexate promotes heterochromatin formation

Keywords: Methotrexate, heterochromatin, *Drosophila*, JAK/STAT, drug screen, position-effect variegation

## Supplementary Table 1. National Cancer Institute Developmental Therapeutics Set III

| <b>AODIII_Plate1-4740</b> |            |            |             |                      |           |
|---------------------------|------------|------------|-------------|----------------------|-----------|
| <b>Well_ID</b>            | <b>No.</b> | <b>NSC</b> | <b>CAS</b>  | <b>DRUG NAME</b>     | <b>MW</b> |
| A02                       | 2          | 1390-R     | 315-30-0    | Allopurinol          | 136       |
| A03                       | 3          | 45388-R    | 4342-03-4   | Dacarbazine          | 182       |
| A04                       | 4          | 409962-T   | 154-93-8    | Carmustine           | 214.05    |
| A05                       | 5          | 109724-X   | 3778-73-2   | Ifosfamide           | 261.09    |
| A06                       | 6          | 38721-U    | 53-19-0     | Mitotane             | 320       |
| A07                       | 7          | 25154-X    | 54-91-1     | Pipobroman           | 356.06    |
| A08                       | 8          | 226080-W   | 53123-88-9  | Rapamycin            | 914.18    |
| A09                       | 9          | 713563-U   | 107868-30-4 | Exemestane           | 296       |
| A10                       | 10         | 712807-X   | 154361-50-9 | Capecitabine         | 359       |
| A11                       | 11         | 747971-U   | 284461-73-0 | Sorafenib            | 464.82    |
| B02                       | 14         | 19893-G    | 51-21-8     | Fluorouracil         | 130       |
| B03                       | 15         | 92859-Q    | 1327-53-3   | Arsenic trioxide     | 198       |
| B04                       | 16         | 26271-N    | 50-18-0     | Cyclophosphamide     | 261       |
| B05                       | 17         | 119875-I   | 15663-27-1  | Cisplatin            | 300.06    |
| B06                       | 18         | 82151-A    | 23541-50-6  | Daunorubicin HCl     | 564       |
| B07                       | 19         | 71423-Q    | 595-33-5    | Megestrol acetate    | 385       |
| B08                       | 20         | 3053-Y     | 50-76-0     | Dactinomycin         | 1255.43   |
| B09                       | 21         | 719344-F   | 120511-73-1 | Anastrozole          | 293.37    |
| B10                       | 22         | 719627-M   | 169590-42-5 | Celecoxib            | 381       |
| B11                       | 23         | 747974-X   | 84449-90-1  | Raloxifene HCl       | 473.59    |
| C02                       | 26         | 32065-L    | 127-07-1    | Hydroxyurea          | 76.05     |
| C03                       | 27         | 362856-R   | 85622-93-1  | Temozolomide         | 194.15    |
| C04                       | 28         | 34462-Q    | 66-75-1     | Uracil mustard       | 252.1     |
| C05                       | 29         | 122758-Q   | 302-79-4    | Tretinoin            | 300.44    |
| C06                       | 30         | 141540-H   | 33419-42-0  | Etoposide            | 589       |
| C07                       | 31         | 241240-Z   | 41575-94-4  | Carboplatin          | 371       |
| C08                       | 32         | 608210-H   | 125317-39-7 | Vinorelbine tartrate | 1079      |
| C09                       | 33         | 719345-G   | 112809-51-5 | Letrozole            | 285       |
| C10                       | 34         | 750690-Z   | 557795-19-4 | Sunitinib            | 398       |
| C11                       | 35         | 719276-G   | 129453-61-8 | Fulvestrant          | 606.75    |
| D02                       | 38         | 752-W      | 154-42-7    | Thioguanine          | 167       |
| D03                       | 39         | 750-U      | 55-98-1     | Busulfan             | 246.29    |
| D04                       | 40         | 63878-P    | 69-74-9     | Cytarabine HCl       | 280       |
| D05                       | 41         | 169780-A   | 24584-09-6  | Dexrazoxone          | 268.27    |
| D06                       | 42         | 180973-S   | 54965-24-1  | Tamoxifen citrate    | 563.65    |
| D07                       | 43         | 266046-O   | 61825-94-3  | Oxaliplatin          | 397       |
| D08                       | 44         | 102816-P   | 320-67-2    | Azacitidine          | 244.21    |
| D09                       | 45         | 721517-Q   | 118072-93-8 | Zoledronic acid      | 272       |
| D10                       | 46         | 279836-C   | 65271-80-9  | Mitoxantrone         | 444       |
| D11                       | 47         | 24559-A    | 18378-89-7  | Plicamycin           | 1085.16   |
| E02                       | 50         | 755-Z      | 50-44-2     | Mercaptopurine       | 152       |
| E03                       | 51         | 13875-O    | 645-05-6    | Altretamine          | 210       |
| E04                       | 52         | 66847-R    | 50-35-1     | Thalidomide          | 258.23    |
| E05                       | 53         | 218321-O   | 53910-25-1  | Pentostatin          | 268.27    |

|     |    |          |             |                            |        |
|-----|----|----------|-------------|----------------------------|--------|
| E06 | 54 | 702294-V | 52205-73-9  | Estramustine disodium phos | 566    |
| E07 | 55 | 740-K    | 59-05-2     | Methotrexate               | 454.44 |
| E08 | 56 | 127716-G | 2353-33-5   | Decitabine                 | 228.21 |
| E09 | 57 | 747972-V | 191732-72-6 | Lenalidomide               | 259.26 |
| E10 | 58 | 715055-R | 184475-35-2 | Gefitinib                  | 446.9  |
| E11 | 59 | 49842-J  | 143-67-9    | Vinblastine sulfate        | 909    |
| F02 | 62 | 762-J    | 55-86-7     | Nitrogen mustard           | 192.52 |
| F03 | 63 | 27640-Z  | 50-91-9     | Floxuridine                | 246.19 |
| F04 | 64 | 77213-K  | 366-70-1    | Procarbazine               | 257.76 |
| F05 | 65 | 613327-S | 122111-03-9 | Gemcitabine HCl            | 299.65 |
| F06 | 66 | 698037-T | 137281-23-3 | Pemetrexed                 | 427.42 |
| F07 | 67 | 14229-X  | 69-05-6     | Acrichine                  | 473    |
| F08 | 68 | 296961-R | 20537-88-6  | Amifostine                 | 214.22 |
| F09 | 69 | 606869-X | 123318-82-1 | Clofarabine                | 304    |
| F10 | 70 | 718781-R | 183319-69-9 | Erlotinib HCl              | 430    |
| F11 | 71 | 369100-F | 99011-02-6  | Imiquimod                  | 240.31 |
| G02 | 74 | 6396-J   | 52-24-4     | Thiotepa                   | 189    |
| G03 | 75 | 45923-X  | 298-81-7    | Methoxsalen                | 216    |
| G04 | 76 | 85998-J  | 18883-66-4  | Streptozocin               | 265.22 |
| G05 | 77 | 3088-N   | 305-03-3    | Chlorambucil               | 304.22 |
| G06 | 78 | 122819-I | 29767-20-2  | Teniposide                 | 656.66 |
| G07 | 79 | 609699-Y | 119413-54-6 | Topotecan HCl              | 457.91 |
| G08 | 80 | 686673-R | 121032-29-9 | Nelarabine                 | 297    |
| G09 | 81 | 312887-C | 75607-67-9  | Fludarabine                | 365.21 |
| G10 | 82 | 732517-W | 863127-77-9 | Dasatinib                  | 488    |
| G11 | 83 | 9706-H   | 51-18-3     | Triethylenemelamine        | 204    |
| H02 | 86 | 18509-Z  | 5451-09-2   | Aminolevulinic acid        | 167.59 |
| H03 | 87 | 79037-R  | 13010-47-4  | Lomustine, CCNU            | 233.7  |
| H04 | 88 | 105014-F | 4291-63-8   | Cladribine                 | 286    |
| H05 | 89 | 26980-J  | 50-07-7     | Mitomycin C                | 334.33 |
| H06 | 90 | 616348-A | 100286-90-6 | Irinotecan HCl             | 623.15 |
| H07 | 91 | 628503-O | 114977-28-5 | Docetaxel                  | 807.89 |
| H08 | 92 | 701852-Q | 149647-78-9 | Vorinostat                 | 264    |
| H09 | 93 | 681239-L | 179324-69-7 | Bortezomib                 | 384.24 |
| H10 | 94 | 743414-R | 152459-95-5 | Imatinib                   | 493.61 |
| H11 | 95 | 8806-C   | 3223-07-2   | Melphalan                  | 341.66 |

**AODIII\_plate2-4741-1**

| <b>Well_ID</b> | <b>No.</b> | <b>NSC</b> | <b>CAS</b>  | <b>DRUG NAME</b>    | <b>MW</b> |
|----------------|------------|------------|-------------|---------------------|-----------|
| A02            | 2          | 67574-I    | 2068-78-2   | Vincristine sulfate | 923.04    |
| A03            | 3          | 745750-H   | 231277-92-2 | Lapatinib           | 581.06    |
| A04            | 4          | 756645-X   | 877399-52-5 | Crizotinib          | 450.3     |
| B02            | 14         | 125066-Y   | 11056-06-7  | Bleomycin           | 1512.61   |
| B03            | 15         | 138783-K   | 3543-75-7   | Bendamustine HCl    | 394.7     |
| C02            | 26         | 125973-L   | 33069-62-4  | Paclitaxel          | 853.92    |
| C03            | 27         | 737754-P   | 635702-64-6 | Pazopanib HCl       | 473.9     |
| D02            | 38         | 246131-R   | 56124-62-0  | Valrubicin          | 723.64    |
| D03            | 39         | 754143-F   | 128517-07-7 | Romidepsin          | 540.6     |
| E02            | 50         | 733504-U   | 159351-69-6 | Everolimus          | 958       |

|     |    |          |             |                 |        |
|-----|----|----------|-------------|-----------------|--------|
| E03 | 51 | 754230-X | 146464-95-1 | Pralatrexate    | 477.4  |
| F02 | 62 | 747599-Q | 641571-10-0 | Nilotinib       | 529.51 |
| F03 | 63 | 760766-C | 443913-73-3 | Vandetanib      | 475.3  |
| G02 | 74 | 747973-W | 219989-84-1 | Ixabepilone     | 506.7  |
| G03 | 75 | 761431-Z | 918504-65-1 | Vemurafenib     | 489.9  |
| H02 | 86 | 123127-R | 25316-40-9  | Doxorubicin HCl | 579.99 |
| H03 | 87 | 761432-A | 183133-96-2 | Cabazitaxel     | 835.9  |

---

|         |                                                                           |
|---------|---------------------------------------------------------------------------|
| WELL_ID | The grid ID for the well (A02, H11, etc.)                                 |
| NSC     | The compound ID number, which we use to key the compound in the database. |
| CAS     | Chemical Abstract Service identification number                           |
| MW      | Molecular Weight                                                          |
