# Supplementary material for: Identification of methotrexate as a heterochromatin-promoting drug
Source: PubMed Central journal article supplement (PMC6690983; doi:10.1038/s41598-019-48137-w), 2019-08-12
Supplement: 41598_2019_48137_MOESM2_ESM.pdf [file 41598_2019_48137_MOESM2_ESM.pdf]

## Supplementary Figures

### Identification of methotrexate as a heterochromatin-promoting drug

Andre C. Loyola, Lin Zhang, Robin Shang, Pranabananda Dutta, Jinghong Li, & Willis X. Li<sup>§</sup>

Department of Medicine, University of California San Diego, La Jolla, CA 92093

§ corresponding author (wxli@ucsd.edu)

Running title: Methotrexate promotes heterochromatin formation

Keywords: Methotrexate, heterochromatin, *Drosophila*, JAK/STAT, drug screen, position-effect variegation

**Figure S1**

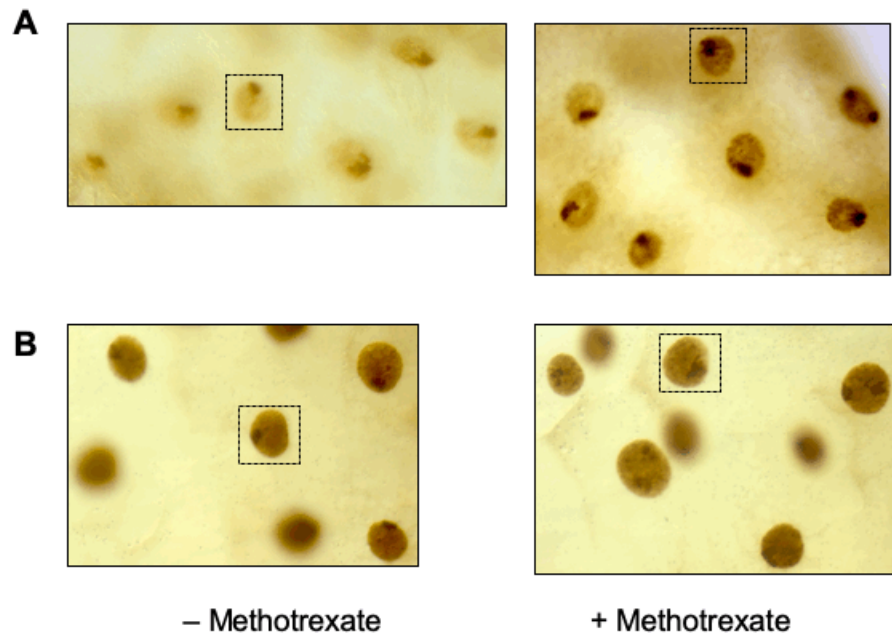

**Figure S1. Effects of methotrexate on salivary gland heterochromatin**

Flies were raised on food with (lower panel) or without (upper panel) methotrexate at 10 $\mu$ M in 33%DMSO. Salivary glands from 3<sup>rd</sup> instar larvae were immunostained with anti-H3K9me3 (A) or anti-HP1 (B), and were photographed with a compound microscope. Heterochromatin levels were quantified as the ratio of H3K9me3-positive or HP1-positive area to the area of the nucleus. Representative images with approximately six nuclei of each type are shown.

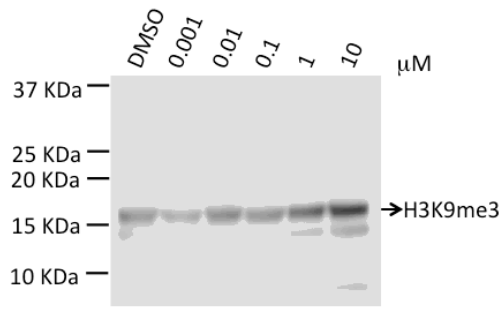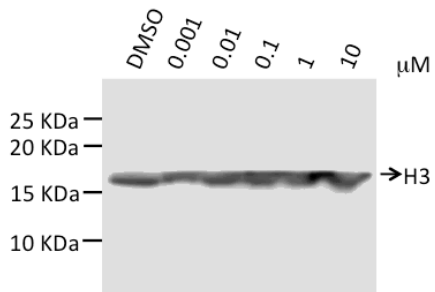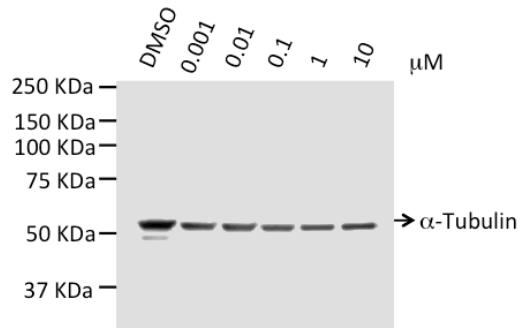

**Figure S2. Full-length protein gels**

Full-length protein gels for the cropped version shown in Figure 3G.
